# Supplementary material for: Size-dependent photoinduced interactions between ZnO nanocrystals and a nitronyl nitroxide radical Nit(o-OH)Ph
Source: Royal Society of Chemistry journal article supplement (doi:10.1039/c2pp25272d), 2012-10-01
Supplement: c2pp25272d.pdf [file c2pp25272d.pdf]

## Supporting information

### Size-dependent photoinduced interactions between ZnO nanocrystals and a nitronyl nitroxide radical Nit(*o*-OH)Ph

Anastasiya V. Yakovenko, Oleksandr L. Stroyuk\*, Vitaly V. Pavlishchuk

*L.V. Pysarzhevsky Institute of Physical Chemistry of National Academy of Sciences of Ukraine,  
31 prosp. Nauky, 03028, Kyiv, Ukraine.*

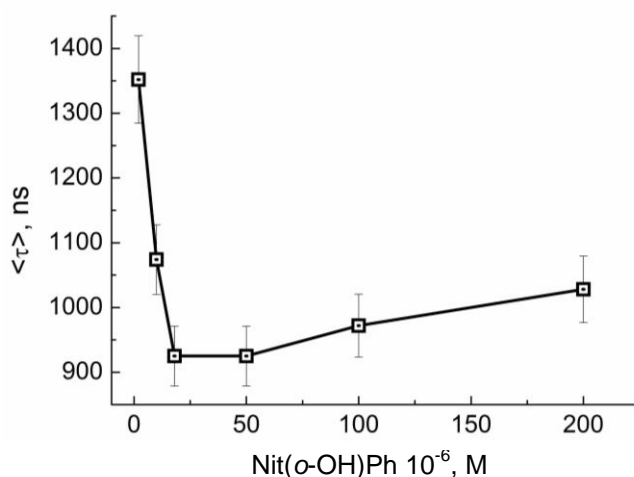

Fig. 1 The average radiative life time  $\langle \tau \rangle$  of ZnO NCs vs the molar concentration of Ni(*o*-OH)Ph radical.  $[\text{ZnO}] = 1 \times 10^{-3}$  M.

*Experimental details:* the photoluminescence decay profiles were obtained using an Edinburgh Instruments FLS920 photon counting system equipped with a EPL-375 picosecond diode laser emitting 60-ps pulses with  $\lambda = 375$  nm. The kinetic curves were approximated by linear combinations of three-four monoexponential functions  $I(t) = \sum A_i \exp(-t/\tau_i)$ , where  $i = 1..4$ ,  $A_i$  – amplitudes,  $\tau_i$  – time constants. The average radiative life time  $\langle \tau \rangle$  was calculated as

$$\langle \tau \rangle = \frac{\sum_i A_i \tau_i^2}{\sum_j A_j \tau_j}$$

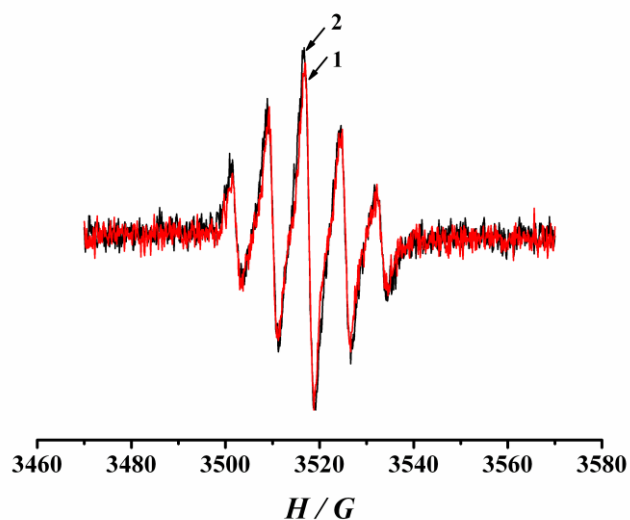

Fig. S2. EPR spectra of an ethanolic solution of Nit(*o*-OH)Ph (curve 1) and an ethanolic solution containing both Nit(*o*-OH)Ph and ZnO NCs (curve 2). The experiments were carried out at  $[\text{ZnO}] = 1 \times 10^{-2}$  M and  $[\text{Nit}(\textit{o}\text{-OH)Ph}] = 1 \times 10^{-4}$  M.

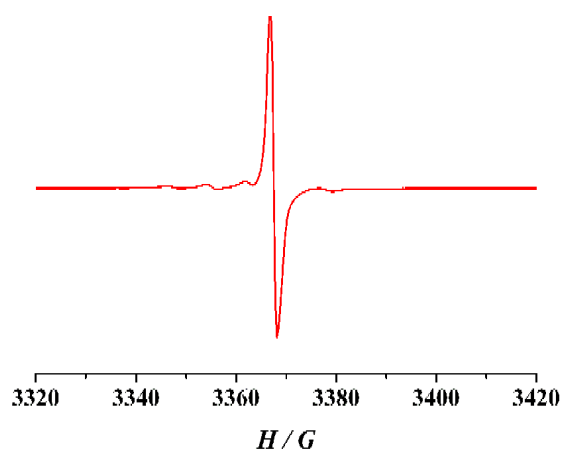

Fig. S3. EPR spectrum of an ethanolic solution of Nit(*o*-OH)Ph in presence of ZnO NCs and diphenylpicrylhydrazyl (DPPH) as inner standard.
